# Supplementary material for: Economic uncertainty and suicide in the United States
Source: Springer Nature journal article supplement (doi:10.1007/s10654-021-00770-4), 2021-06-01
Supplement: MOESM1 [file 19247814]

## ONLINE APPENDIX

Table A1 – Summary Statistics

| Variable                                            | Mean   | Std. Dev. | Min    | Max    |
|-----------------------------------------------------|--------|-----------|--------|--------|
| Monthly suicides per million people (state-level)   | 11.81  | 4.10      | 3.27   | 40.55  |
| Three component index                               | 113.70 | 35.99     | 57.20  | 245.13 |
| News-based index                                    | 120.71 | 45.98     | 44.78  | 283.67 |
| Uncertainty index                                   | 95.80  | 42.87     | 37.27  | 234.09 |
| Unemployment rate                                   | 5.72   | 2.00      | 2.10   | 14.60  |
| State GDP growth rate (compared to previous period) | 1.90   | 4.78      | -25.10 | 58.10  |
| State budget surplus dummy                          | 0.70   | 0.46      | 0      | 1      |
| State poverty rate                                  | 12.70  | 3.42      | 4.50   | 25.80  |
| Average weekly benefit per capita                   | 133.11 | 24.22     | 81.80  | 244.72 |
| Percentage of population female                     | 50.78  | 0.77      | 47.92  | 52.93  |
| Percentage of population aged 19 - 65               | 61.94  | 1.68      | 57.77  | 70.95  |

Table A2 – Results of the fixed effects regression with additional control variables

|                                                | (1)                           | (2)                             | (3)                             |
|------------------------------------------------|-------------------------------|---------------------------------|---------------------------------|
| Natural logarithm of the three component index | 7.478***<br>[3.333 - 11.623]  |                                 |                                 |
| Natural logarithm of the news based index      |                               | 3.662***<br>[1.632 - 5.691]     |                                 |
| Natural logarithm of the uncertainty index     |                               |                                 | 4.421***<br>[1.971 - 6.871]     |
| unemployment rate                              | 0.012<br>[-0.084 - 0.107]     | 0.012<br>[-0.084 - 0.107]       | 0.012<br>[-0.084 - 0.107]       |
| Constant term                                  | 65.623**<br>[3.013 - 128.233] | 82.771***<br>[23.232 - 142.310] | 81.332***<br>[21.587 - 141.077] |
| R-squared within                               | 0.292                         | 0.292                           | 0.292                           |

The dependent variable is the number of suicides per million people (*suicides*). Additional control variables include the GDP growth rate; a dummy variable for budget surplus; the poverty rate; the average weekly benefit; the percentage of the population that is female; and the percentage aged 19-65. Fixed effects at the State level. Month-year dummies are used as controls in the regressions. Confidence intervals in brackets. Standard errors are clustered at the State level.  $N=9872$ . \*\*\*  $p<0.01$ , \*\*  $p<0.05$ , \*  $p<0.1$ .

Table A3 – Sensitivity analysis A (excluding demographic variables)

|                                                | (1)                             | (2)                         | (3)                         |
|------------------------------------------------|---------------------------------|-----------------------------|-----------------------------|
| Natural logarithm of the three component index | 7.944***<br>[3.737 - 12.151]    |                             |                             |
| Natural logarithm of the news based index      |                                 | 3.890***<br>[1.830 - 5.950] |                             |
| Natural logarithm of the uncertainty index     |                                 |                             | 4.696***<br>[2.209 - 7.183] |
| unemployment rate                              | 0.012<br>[-0.103 - 0.128]       | 0.012<br>[-0.103 - 0.128]   | 0.012<br>[-0.103 - 0.128]   |
| Constant term                                  | -25.152**<br>[-44.578 - -5.727] | -6.937<br>[-16.815 - 2.941] | -8.465<br>[-19.137 - 2.207] |
| R-squared within                               | 0.2882                          | 0.2882                      | 0.2882                      |

The dependent variable is the number of suicides per million people (*suicides*). Additional control variables include the GDP growth rate; a dummy variable for budget surplus; the poverty rate; and the average weekly benefit. Fixed effects at the State level apply. Month-year dummies are used as controls in the regressions. Confidence intervals in brackets. Standard errors are clustered at the State level.  $N=9872$ . \*\*\*  $p<0.01$ , \*\*  $p<0.05$ , \*  $p<0.1$ .

Table A4 – Sensitivity Analysis B (demographic controls only)

|                                                | (1)                           | (2)                            | (3)                            |
|------------------------------------------------|-------------------------------|--------------------------------|--------------------------------|
| Natural logarithm of the three component index | 7.458***<br>[3.211 - 11.704]  |                                |                                |
| Natural logarithm of the news based index      |                               | 3.652***<br>[1.572 - 5.731]    |                                |
| Natural logarithm of the uncertainty index     |                               |                                | 4.409***<br>[1.899 - 6.919]    |
| unemployment rate                              | 0.007<br>[-0.090 - 0.104]     | 0.007<br>[-0.090 - 0.104]      | 0.007<br>[-0.090 - 0.104]      |
| Constant term                                  | 63.832*<br>[-5.748 - 133.411] | 80.933**<br>[14.186 - 147.680] | 79.498**<br>[12.564 - 146.433] |
| R-squared within                               | 0.2917                        | 0.2917                         | 0.2917                         |

The dependent variable is the number of suicides per million people (*suicides*). Additional control variables include the percentage of the population that is female; and the percentage of the population aged 19-65. Fixed effects at the State level apply. Month-year dummies are used as controls in the regressions. Confidence intervals in brackets. Standard errors are clustered at the State level.  $N=9872$ . \*\*\*  $p<0.01$ , \*\*  $p<0.05$ , \*  $p<0.1$ .

Table A5 – Fixed Effects Regression results using uncertainty measured in levels

|                       | (1)                         | (2)                          | (3)                         |
|-----------------------|-----------------------------|------------------------------|-----------------------------|
| three component index | 0.080***<br>[0.037 - 0.124] |                              |                             |
| news based index      |                             | 0.035***<br>[0.016 - 0.054]  |                             |
| uncertainty index     |                             |                              | 0.069***<br>[0.032 - 0.106] |
| unemployment rate     | 0.010<br>[-0.105 - 0.125]   | 0.010<br>[-0.105 - 0.125]    | 0.010<br>[-0.105 - 0.125]   |
| Constant              | 3.919*<br>[-0.507 - 8.345]  | 7.980***<br>[5.706 - 10.254] | 7.177***<br>[4.483 - 9.871] |
| Observations          | 9,872                       | 9,872                        | 9,872                       |
| R-squared within      | 0.288                       | 0.288                        | 0.288                       |

The dependent variable is the number of suicides per million people (*suicides*). Fixed effects at the State level apply. Month-year dummies are used as controls in the regressions. Confidence intervals in brackets. Standard errors are clustered at the State level.  $N=9872$ . \*\*\*  $p<0.01$ , \*\*  $p<0.05$ , \*  $p<0.1$ .

Table A6 – Fixed Effects Regression results: The relationship between unemployment and suicide, without controlling for uncertainty

|                    |                   |
|--------------------|-------------------|
| unemployment rate  | 0.010             |
|                    | [-0.105 - 0.125]  |
| year month dummies | yes               |
| Constant           | 11.083***         |
|                    | [10.283 - 11.882] |
| Observations       | 9,872             |
| R-squared within   | 0.288             |

The dependent variable is the number of suicides per million people (*suicides*). Fixed effects at the State level apply. Month-year dummies are used as controls in the regressions. Confidence intervals in brackets. Standard errors are clustered at the State level.  $N=9872$ . \*\*\*  $p<0.01$ , \*\*  $p<0.05$ , \*  $p<0.1$ .

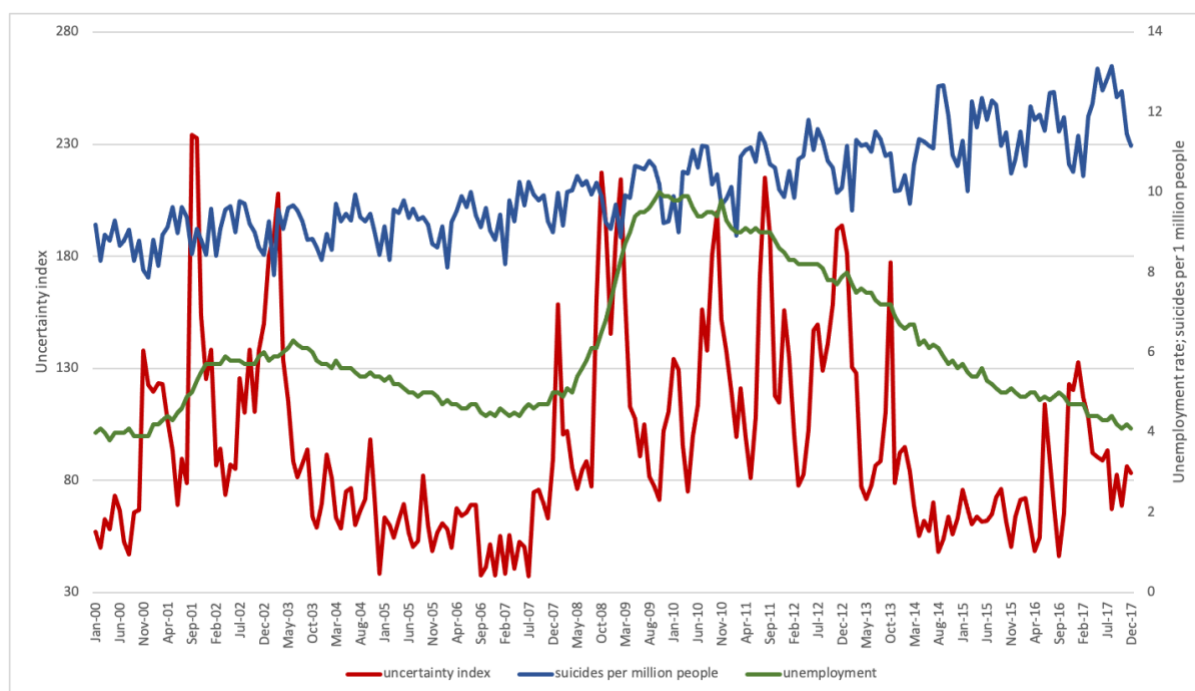

Figure A1 – Monthly suicides per million people, economic uncertainty index and unemployment rate in the US, from 2000 to 2017
